# Supplementary material for: A novel fluorescent indicator for Ba2+ in aqueous micellar solutionsElectronic supplementary information (ESI) available: synthesis and characterisation of 1. See http://www.rsc.org/suppdata/cc/b3/b311613a/
Source: Royal Society of Chemistry journal article supplement (doi:10.1039/b311613a), 2004-01-01
Supplement: b311613a.doc [file b311613a.doc]

# Supporting Information for

A novel fluorescent indicator for Ba2+ in aqueous micellar solutions

# Yoshio Nakahara, Toshiyuki Kida, Yohji Nakatsuji* and Mitsuru Akashi*

# *Department of Molecular Chemistry, Graduate School of Engineering, Osaka University, 2-1 Yamadaoka, Suita, Osaka 565-0871, Japan.*

# Synthetic route for compounds 1

Starting material monoazacryptand was prepared according to the following literature.

Y. Nakatsuji, T. Sunagawa, A. Masuyama, T. Kida and I. Ikeda, *J. Incl. Phenom.* 1997, **29**, 289.

16-(1-Pyrenylmethyl)-1,11-dimethyl-3,6,9,13,19,21,24,27-octa

oxa-16-azabicyclo[9.9.7]heptacosane 1

THF-toluene solution (30 mL, 1:1 v/v) of a monoazacryptand (0.830 g, 1.97 x 10-3 mol), triethylamine (2 mL), 1-bromomethylpyrene (1.74 g, 5.91 x 10-3 mol) was refluxed for 12 h. After cooling to room temperature, the mixture was filtered and the solvent was evaporated. The crude product was purified by chromatography over alumina (benzene:ethyl acetate = 90:10) to give 0.718 g of a slightly yellowish viscous liquid. Yield 57%.

H NMR (400 MHz, CDCl3):s, 6H), 2.87-2.98 (m, 4H), 3.48-3.85 (m, 28H), 4.33 (s, 2H), 7.95-8.56 (m, 9H). IR (neat, cm-1) :3040, 2820, 1930, 1740, 1590, 1450, 1370, 1300, 1040, 850, 710. MS(FAB)(m/z) 636 (M++1). Anal. Calcd for C37H49O8N1: C, 69.90; H, 7.77; N, 2.20. Found: C, 69.96; H, 7.79; N, 1.91.
